# Supplementary material for: Aeromonas veronii Infection in Commercial Freshwater Fish: A Potential Threat to Public Health
Source: PubMed Central journal article supplement (PMC7222775; doi:10.3390/ani10040608), 2020-04-02
Supplement: animals-10-00608-s001.pdf [file animals-10-00608-s001.pdf]

## Supplementary

**Table S1.** Biochemical and physiological characteristic of strains.

| Projects                | Results | Projects             | Results |
|-------------------------|---------|----------------------|---------|
| Oxidase                 | +       | Lactose              | —       |
| H <sub>2</sub> S        | —       | Maltose              | +       |
| Dynamic experiment      | +       | Mannite              | +       |
| Gelatin liquefaction    | d       | Cellobiose           | d       |
| Citrate                 | d       | Salicin              | d       |
| Inositol                | —       | Esculin              | +       |
| Methyl red              | +       | Sorbierite           | —       |
| V-P test                | +       | Sucrose              | +       |
| Indole                  | +       | Rhamnose             | —       |
| Lysine decarboxylase    | +       | Arabinose            | —       |
| Ornithine decarboxylase | d       | Fructose             | d       |
| 0% NaCl                 | +       | Xylose               | —       |
| 6% NaCl                 | —       | Arginine dihydrolase | +       |
| Glucose                 | +       |                      |         |

Note: The “+” means positive reaction; the “—” means negative reaction; the “d” means differences exist between strains.

**Table S2.** Virulence genes of *A. veronii* isolated.

| <i>Carassius auratus</i> — Spring , Aquatic markets |              |            |            |            |            |            |            |             |
|-----------------------------------------------------|--------------|------------|------------|------------|------------|------------|------------|-------------|
| Serial number                                       | Strains name | <i>lip</i> | <i>exu</i> | <i>ser</i> | <i>Aha</i> | <i>aer</i> | <i>act</i> | <i>LuxS</i> |
| 1                                                   | SJ4091-4     | +          | -          | +          | -          | +          | +          | -           |
| 2                                                   | SJ4092-2     | -          | +          | -          | -          | -          | -          | -           |
| 3                                                   | SJ4092-5     | +          | -          | -          | +          | -          | +          | -           |
| 4                                                   | SJ4101-2     | +          | -          | +          | -          | +          | +          | +           |
| 5                                                   | SJ4102-1     | +          | +          | +          | -          | +          | +          | -           |
| 6                                                   | SJ4102-3     | +          | +          | -          | -          | +          | +          | -           |
| 7                                                   | SJ4102-4     | +          | -          | -          | -          | +          | +          | +           |
| 8                                                   | SJ4102-5     | +          | +          | +          | +          | +          | +          | -           |
| Total                                               |              | 7          | 4          | 4          | 2          | 6          | 7          | 2           |

| <i>Carassius auratus</i> — Spring , Supermarkets |              |            |            |            |            |            |            |             |
|--------------------------------------------------|--------------|------------|------------|------------|------------|------------|------------|-------------|
| Serial number                                    | Strains name | <i>lip</i> | <i>exu</i> | <i>ser</i> | <i>Aha</i> | <i>aer</i> | <i>act</i> | <i>LuxS</i> |
| 9                                                | CJ4121-1     | -          | +          | -          | -          | +          | +          | +           |
| 10                                               | CJ4121-3     | -          | +          | +          | -          | -          | -          | +           |
| 11                                               | CJ4131-2     | -          | -          | +          | -          | -          | -          | -           |

Total 0 2 2 0 1 1 2

*Carassius auratus* — Summer , Aquatic markets

| Serial number | Strains name | <i>lip</i> | <i>exu</i> | <i>ser</i> | <i>Aha</i> | <i>aer</i> | <i>act</i> | <i>LuxS</i> |
|---------------|--------------|------------|------------|------------|------------|------------|------------|-------------|
| 12            | SJ7211-1     | +          | +          | -          | +          | +          | +          | -           |
| 13            | SJ7212-1     | +          | -          | -          | -          | +          | +          | -           |
| 14            | SJ7212-3     | +          | -          | +          | +          | +          | +          | +           |
| 15            | SJ7213-2     | +          | -          | -          | +          | +          | +          | +           |
| 16            | SJ7213-5     | +          | +          | +          | -          | +          | +          | +           |
| 17            | SJ7231-1     | -          | -          | -          | -          | +          | +          | -           |
| 18            | SJ7231-3     | -          | -          | +          | +          | +          | +          | +           |
| 19            | SJ7232-2     | -          | +          | +          | +          | +          | +          | -           |
| 20            | SJ7232-5     | -          | -          | +          | -          | +          | +          | +           |
| 21            | SJ7233-1     | -          | -          | +          | -          | +          | +          | -           |
| 22            | SJ7233-5     | -          | +          | +          | -          | +          | +          | +           |
| 23            | SJ7292-3     | -          | +          | +          | -          | +          | +          | +           |
| 24            | SJ7292-4     | -          | -          | +          | -          | +          | -          | -           |
| 25            | SJ7291-2     | +          | -          | -          | +          | +          | +          | -           |
| Total         |              | 6          | 5          | 9          | 6          | 14         | 13         | 7           |

*Carassius auratus* — Summer , Supermarkets

| Serial number | Strains name | <i>lip</i> | <i>exu</i> | <i>ser</i> | <i>Aha</i> | <i>aer</i> | <i>act</i> | <i>LuxS</i> |
|---------------|--------------|------------|------------|------------|------------|------------|------------|-------------|
| 26            | CJ7251-3     | +          | -          | -          | +          | +          | -          | +           |
| 27            | CJ7251-4     | +          | +          | +          | -          | +          | +          | -           |
| 28            | CJ7251-5     | +          | +          | -          | +          | +          | +          | -           |
| 29            | CJ7252-1     | -          | -          | -          | -          | +          | -          | +           |
| 30            | CJ7252-2     | -          | -          | +          | -          | +          | +          | +           |
| Total         |              | 3          | 2          | 2          | 2          | 5          | 3          | 3           |

*Ctenopharyngodon idella* — Spring , Aquatic markets

| Serial number | Strains name | <i>lip</i> | <i>exu</i> | <i>ser</i> | <i>Aha</i> | <i>aer</i> | <i>act</i> | <i>LuxS</i> |
|---------------|--------------|------------|------------|------------|------------|------------|------------|-------------|
| 31            | SC4121-1     | +          | -          | -          | +          | -          | -          | -           |
| 32            | SC4121-2     | +          | +          | -          | +          | +          | +          | +           |
| 33            | SC4121-4     | +          | -          | +          | +          | +          | -          | -           |
| 34            | SC4121-5     | +          | +          | -          | +          | +          | +          | +           |
| 35            | SC4122-2     | +          | -          | +          | +          | +          | +          | +           |
| 36            | SC4122-4     | +          | +          | +          | -          | +          | +          | +           |
| 37            | SC4122-5     | +          | +          | +          | +          | +          | +          | +           |
| 38            | SC4123-1     | +          | +          | -          | +          | +          | -          | +           |

|       |          |   |   |   |   |   |   |   |
|-------|----------|---|---|---|---|---|---|---|
| 39    | SC4123-3 | + | - | + | + | + | + | + |
| Total |          | 9 | 5 | 5 | 8 | 8 | 6 | 7 |

*Ctenopharyngodon idella* — Spring, Supermarkets

| Serial number | Strains name | <i>lip</i> | <i>exu</i> | <i>ser</i> | <i>Aha</i> | <i>aer</i> | <i>act</i> | <i>LuxS</i> |
|---------------|--------------|------------|------------|------------|------------|------------|------------|-------------|
| 40            | CC4151-1     | -          | -          |            | -          | +          | +          | +           |
| 41            | CC4151-3     | +          | -          | +          | -          | +          | +          | -           |
| 42            | CC4152-4     | +          | -          | -          | -          | +          | -          | -           |
| Total         |              | 2          | 0          | 1          | 0          | 3          | 2          | 1           |

*Ctenopharyngodon idella* — Summer, Aquatic markets

| Serial number | Strains name | <i>lip</i> | <i>exu</i> | <i>ser</i> | <i>Aha</i> | <i>aer</i> | <i>act</i> | <i>LuxS</i> |
|---------------|--------------|------------|------------|------------|------------|------------|------------|-------------|
| 43            | SC7251-1     | -          | +          | +          | +          | +          | +          | -           |
| 44            | SC7251-5     | -          | -          | +          | -          | +          | +          | -           |
| 45            | SC7252-1     | -          | -          | +          | -          | +          | -          | -           |
| 46            | SC7252-4     | -          | +          | +          | +          | +          | +          | +           |
| 47            | SC7261-1     | -          | +          | +          | -          | -          | -          | +           |
| 48            | SC7261-3     | -          | +          | +          | -          | -          | -          | +           |
| 49            | SC7262-1     | -          | +          | +          | +          | +          | +          | +           |
| 50            | SC7271-1     | -          | -          | +          | -          | +          | +          | -           |
| 51            | SC7271-3     | -          | +          | +          | -          | +          | +          | -           |
| 52            | SC7272-5     | -          | -          | +          | +          | -          | -          | +           |
| Total         |              | 0          | 6          | 10         | 4          | 7          | 6          | 5           |

*Ctenopharyngodon idella* — Summer, Supermarkets

| Serial number | Strains name | <i>lip</i> | <i>exu</i> | <i>ser</i> | <i>Aha</i> | <i>aer</i> | <i>act</i> | <i>LuxS</i> |
|---------------|--------------|------------|------------|------------|------------|------------|------------|-------------|
| 53            | CC7281-2     | -          | -          | -          | -          | +          | +          | -           |
| 54            | CC7281-5     | +          | -          | -          | +          | +          | -          | +           |
| 55            | CC7282-3     | -          | -          | -          | -          | -          | -          | +           |
| 56            | CC7282-4     | -          | +          | -          | -          | -          | -          | +           |
| Total         |              | 1          | 1          | 0          | 1          | 2          | 1          | 3           |

*Cyprinus carpio* — Spring, Aquatic markets

| Serial number | Strains name | <i>lip</i> | <i>exu</i> | <i>ser</i> | <i>Aha</i> | <i>aer</i> | <i>act</i> | <i>LuxS</i> |
|---------------|--------------|------------|------------|------------|------------|------------|------------|-------------|
| 57            | SL4131-1     | -          | -          | +          | +          | +          | +          | +           |
| 58            | SL4131-3     | +          | +          | +          | -          | +          | +          | -           |
| 59            | SL4132-1     | +          | -          | +          | +          | +          | +          | -           |
| 60            | SL4132-2     | -          | -          | -          | +          | +          | +          | +           |
| 61            | SL4132-5     | +          | +          | -          | +          | +          | +          | -           |

|       |          |   |   |   |   |   |   |   |
|-------|----------|---|---|---|---|---|---|---|
| 62    | SL4141-2 | + | - | - | - | - | + | - |
| 63    | SL4131-5 | + | + | + | - | + | + | - |
| Total |          | 5 | 3 | 4 | 4 | 6 | 7 | 2 |

*Cyprinus carpio* — Spring , Supermarkets

| Serial number | Strains name | <i>lip</i> | <i>exu</i> | <i>ser</i> | <i>Aha</i> | <i>aer</i> | <i>act</i> | <i>LuxS</i> |
|---------------|--------------|------------|------------|------------|------------|------------|------------|-------------|
| 64            | CL4251-1     | +          | +          | +          | -          | +          | +          | +           |
| 65            | CL4251-4     | +          | +          | -          | +          | +          | +          | +           |
| 66            | CL4252-2     | +          | +          | +          | -          | +          | +          | -           |
| Total         |              | 3          | 3          | 2          | 1          | 3          | 3          | 2           |

*Cyprinus carpio* — Summer , Aquatic markets

| Serial number | Strains name | <i>lip</i> | <i>exu</i> | <i>ser</i> | <i>Aha</i> | <i>aer</i> | <i>act</i> | <i>LuxS</i> |
|---------------|--------------|------------|------------|------------|------------|------------|------------|-------------|
| 67            | SL7231-1     | -          | -          | -          | -          | +          | -          | -           |
| 68            | SL7231-3     | -          | +          | +          | -          | +          | +          | +           |
| 69            | SL7231-5     | -          | -          | -          | -          | +          | +          | +           |
| 70            | SL7232-1     | -          | -          | +          | -          | +          | +          | +           |
| 71            | SL7232-4     | -          | -          | -          | +          | +          | +          | -           |
| 72            | SL7232-5     | -          | +          | +          | -          | +          | -          | +           |
| 73            | SL7233-2     | -          | +          | -          | -          | +          | -          | -           |
| 74            | SL7233-4     | -          | +          | -          | -          | +          | +          | +           |
| Total         |              | 0          | 4          | 3          | 1          | 8          | 5          | 5           |

*Cyprinus carpio* — Summer , Supermarkets

| Serial number | Strains name | <i>lip</i> | <i>exu</i> | <i>ser</i> | <i>Aha</i> | <i>aer</i> | <i>act</i> | <i>LuxS</i> |
|---------------|--------------|------------|------------|------------|------------|------------|------------|-------------|
| 75            | CL8051-1     | -          | -          | +          | +          | +          | +          | -           |
| 76            | CL8051-4     | -          | +          | +          | -          | +          | +          | -           |
| 77            | CL8052-1     | -          | +          | +          | -          | +          | +          | +           |
| 78            | CL8052-2     | +          | -          | -          | -          | +          | +          | +           |
| 79            | CL8052-5     | +          | +          | -          | -          | +          | +          | -           |
| Total         |              | 2          | 3          | 3          | 1          | 5          | 5          | 2           |

*Silurus asotus* — Spring , Aquatic markets

| Serial number | Strains name | <i>lip</i> | <i>exu</i> | <i>ser</i> | <i>Aha</i> | <i>aer</i> | <i>act</i> | <i>LuxS</i> |
|---------------|--------------|------------|------------|------------|------------|------------|------------|-------------|
| 80            | SN4251-2     | -          | +          | -          | -          | +          | +          | -           |
| 81            | SN4252-3     | +          | +          | -          | +          | +          | -          | +           |
| Total         |              | 1          | 2          | 0          | 1          | 2          | 1          | 1           |

*Silurus asotus* — Spring , Supermarkets

| Total                                                     |              | 0          |            |            |            |            |            |             |
|-----------------------------------------------------------|--------------|------------|------------|------------|------------|------------|------------|-------------|
| <b><i>Silurus asotus</i> — — Summer , Aquatic markets</b> |              |            |            |            |            |            |            |             |
| Serial number                                             | Strains name | <i>lip</i> | <i>exu</i> | <i>ser</i> | <i>Aha</i> | <i>aer</i> | <i>act</i> | <i>LuxS</i> |
| 82                                                        | SN7251-1     | -          | +          | +          | -          | -          | +          | -           |
| 83                                                        | SN7251-4     | -          | +          | +          | +          | +          | -          | -           |
| 84                                                        | SN7251-5     | -          | +          | +          | +          | +          | -          | -           |
| 85                                                        | SN7252-4     | -          | +          | +          | +          | +          | +          | +           |
| Total                                                     |              | 0          | 4          | 4          | 3          | 3          | 2          | 1           |
| <b><i>Silurus asotus</i> — — Summer , Supermarkets</b>    |              |            |            |            |            |            |            |             |
| Serial number                                             | Strains name | <i>lip</i> | <i>exu</i> | <i>ser</i> | <i>Aha</i> | <i>aer</i> | <i>act</i> | <i>LuxS</i> |
| 86                                                        | CN8052-1     | +          | -          | -          | -          | +          | +          | +           |
| 87                                                        | CN8052-5     | -          | -          | -          | +          | +          | +          | +           |
| Total                                                     |              | 1          | 0          | 0          | 1          | 2          | 2          | 2           |
| Total                                                     |              | 40         | 45         | 47         | 35         | 77         | 62         | 52          |

Note: The “+” means positive reaction; the “-” means negative reaction.

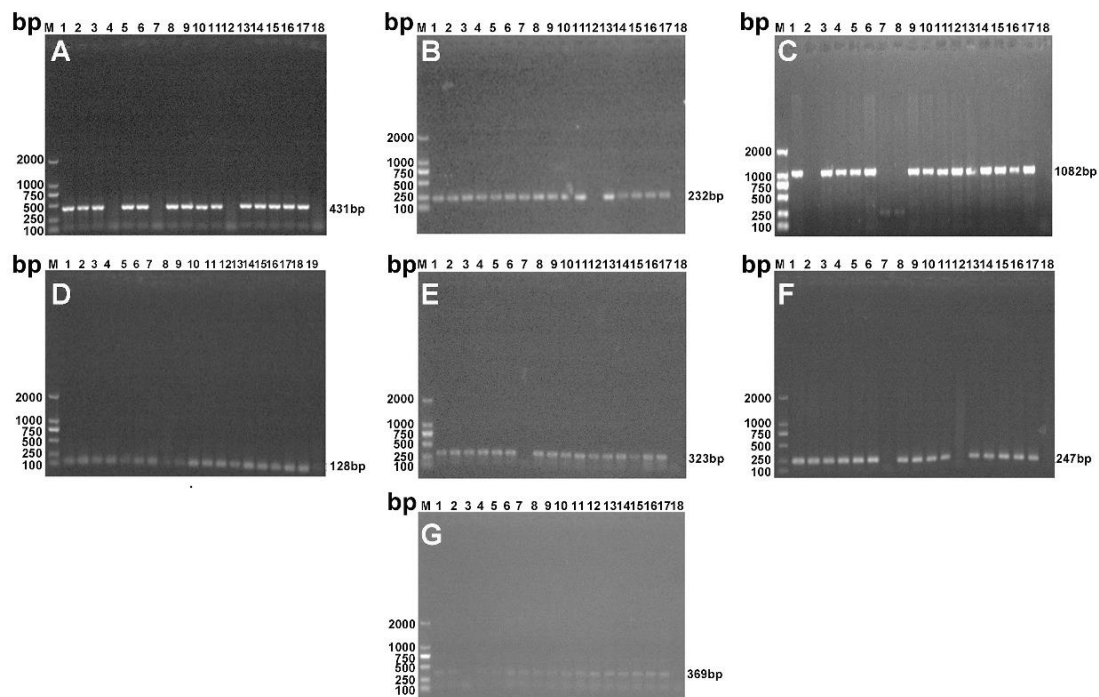

**Supplementary Figure 1.** The detection result of seven major virulence genes (*aer*, *act*, *Aha*, *ser*, *exu*, *lip*, *LuxS*) of the isolated strains (part).  
A, *aer* detection result; B, *act* detection result; C, *Aha* detection result; D, *ser* detection result; E, *exu* detection result; F, *lip* detection result; G, *LuxS* detection result; lane 17 in A,B,C,E,F,G : positive control; lane 18 in D : positive control; lane 18 in A,B,C,E,F,G : negative control; lane 19 in D : negative control; lane M : DNA marker.
